# Supplementary material
Source: PubMed Central journal article supplement (PMC5775172)

The Structure of the Large Regulatory  $\alpha$ -Subunit of Phosphorylase Kinase as  
Determined by Hydrogen Deuterium Exchange and Modeling

Mary Ashley Rimmer, Owen W. Nadeau, Jianyi Yang, Antonio Artigues, Yang  
Zhang, and Gerald M. Carlson

Supplementary Materials

Figure S1: Peptide map of deuterated peptides identified and analyzed for the  $\alpha$  subunit, resulting in 74% coverage.

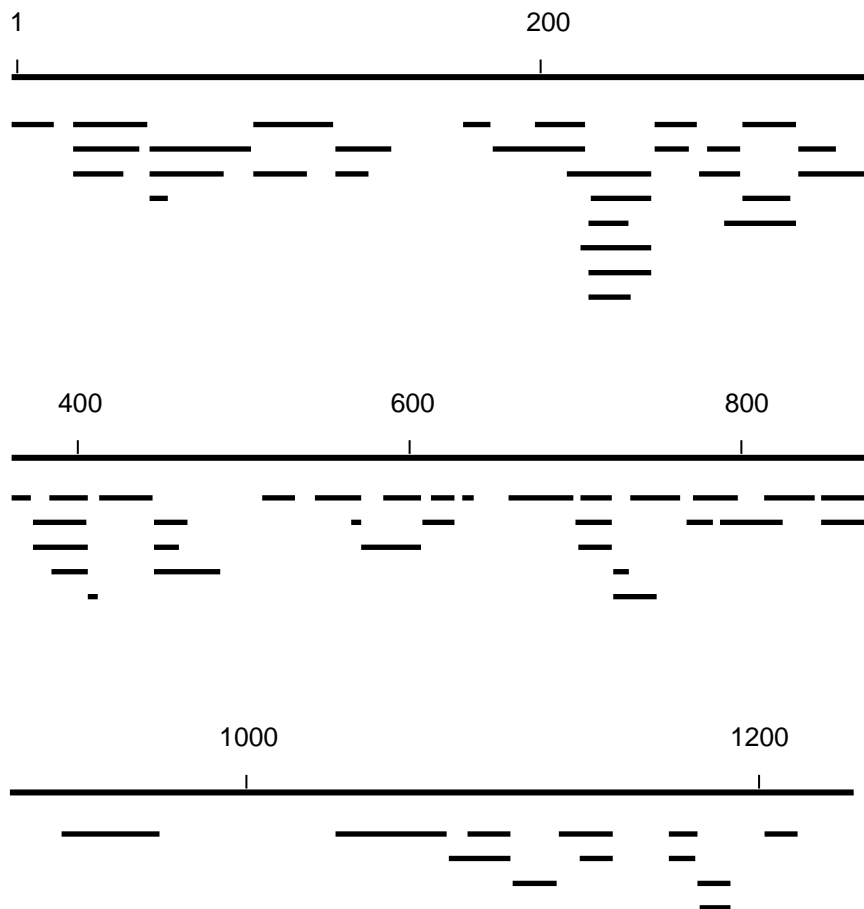

Figure S2: Time courses for deuterium incorporation into all identified peptides. Error bars are the average deviation of independent exchange experiments as described under *Materials and Methods*; error bars are present for all data points, although some are smaller than the symbols.

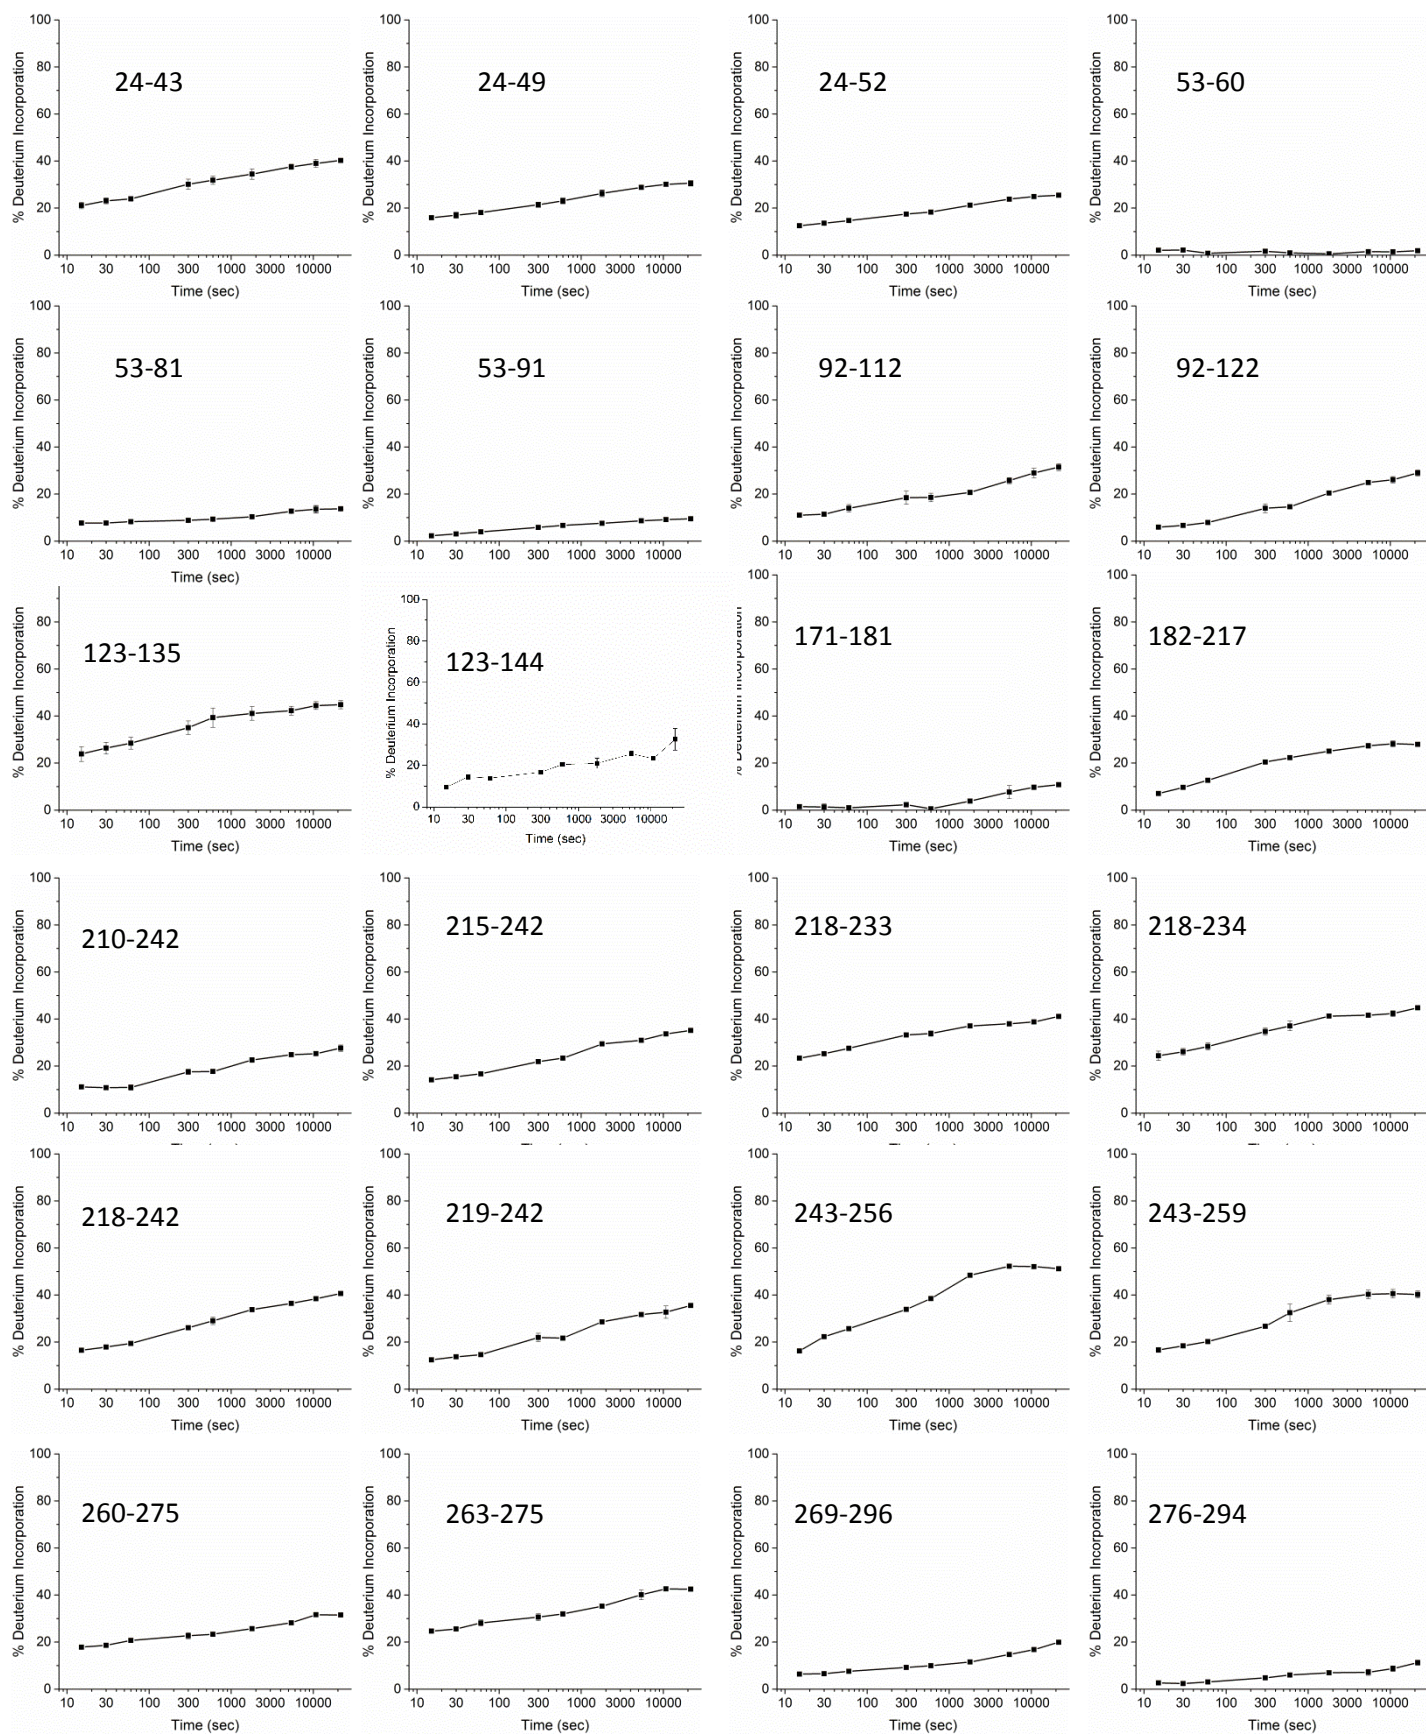

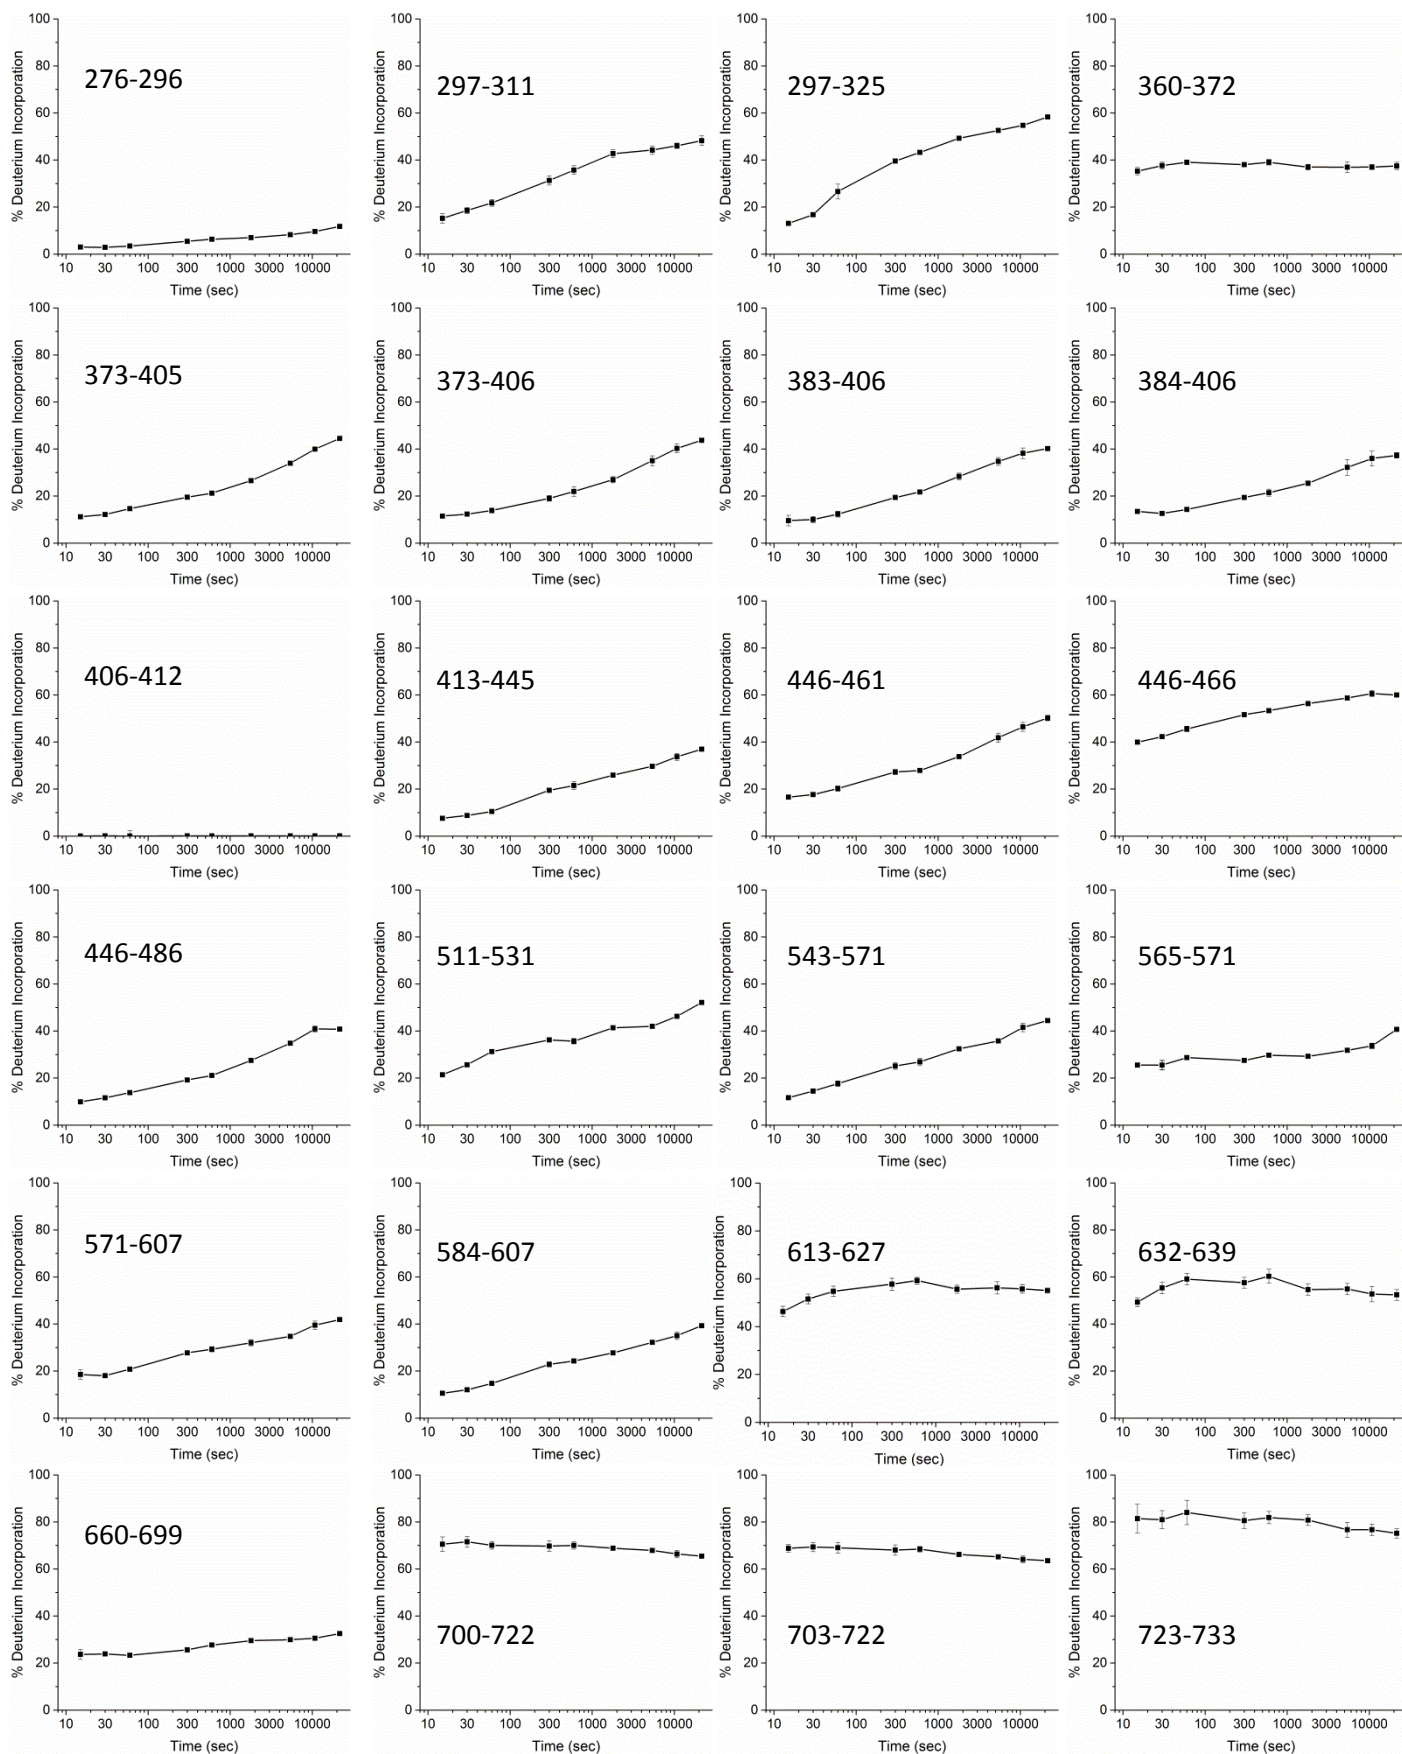

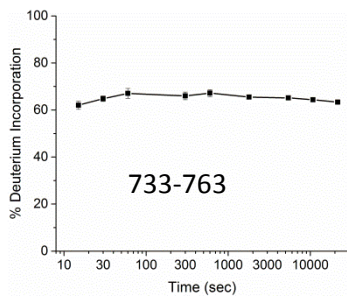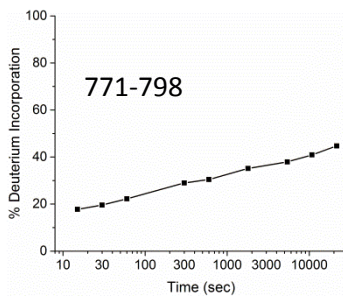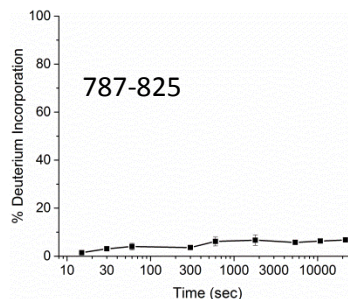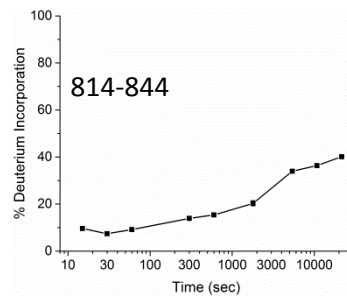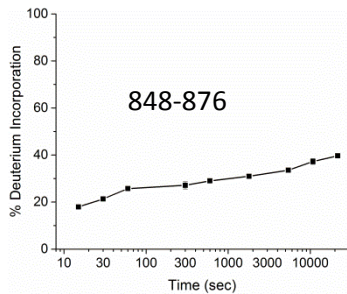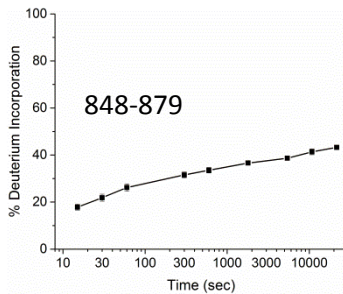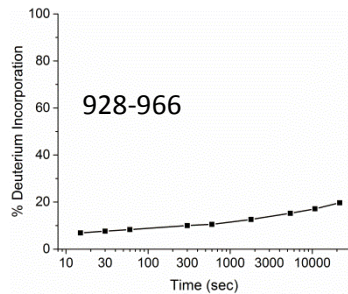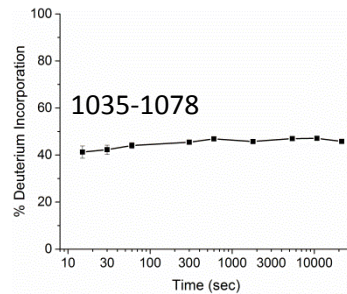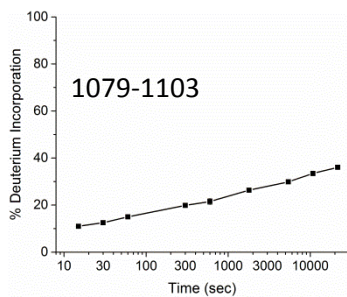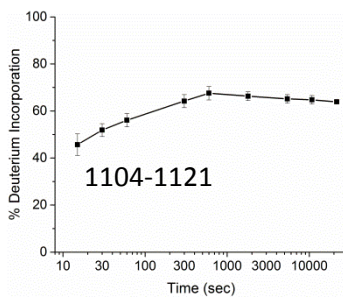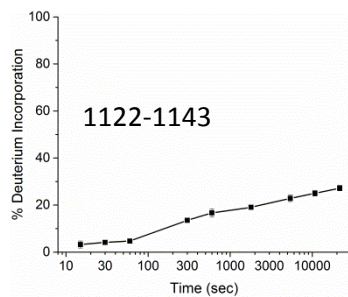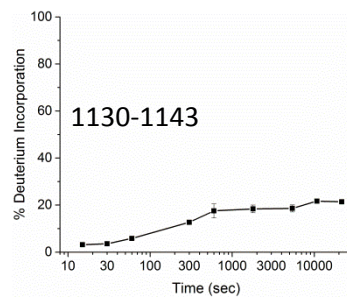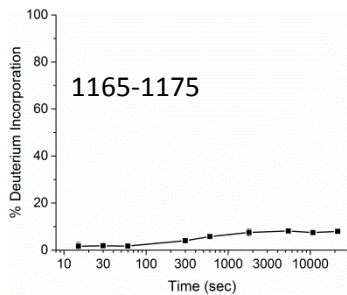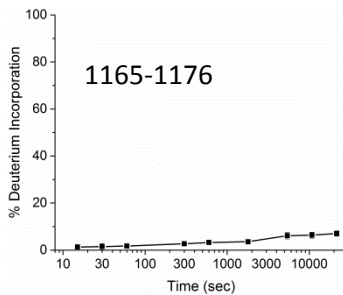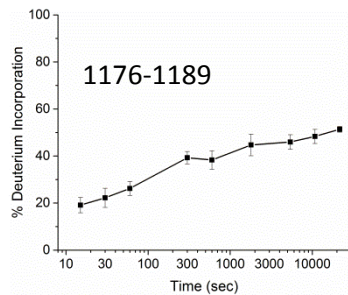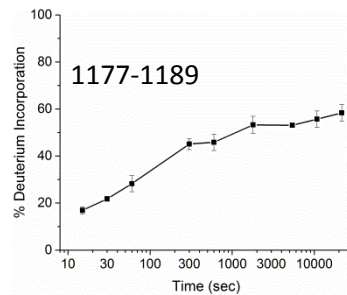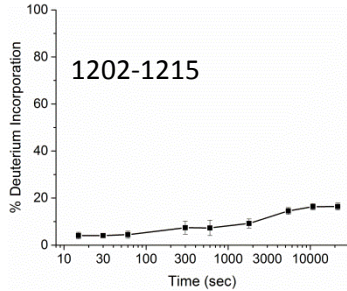

Supplement: PRO-27-472-s001.pdf [file PRO-27-472-s001.pdf]
